# Supplementary material
Source: HighWire-hosted journal article supplement (https://bmjopen.bmj.com/content/8/10/e022499)
Supplement: inline-supplementary-material-6 [file inline-supplementary-material-6.pdf]

Risk of Bias for non-experimental studies

|    | Assessment questions                                                                          | Non-experimental studies |              |              |              |              |              |              |
|----|-----------------------------------------------------------------------------------------------|--------------------------|--------------|--------------|--------------|--------------|--------------|--------------|
|    |                                                                                               | Lamadah 2014             | Boel 2009    | Mabina 1997  | Garry 2000   | Parsons 1999 | Neri 2017    | Davis 1984   |
| 1  | Is sample size justified?                                                                     | No                       | No           | No           | No           | No           | No           | No           |
| 2  | Is there good response rate?                                                                  | Not reported             | Yes          | Yes          | Yes          | Not reported | Yes          | Yes          |
| 3  | Is selection bias present?                                                                    | Yes                      | No           | No           | No           | Yes          | No           | No           |
| 4  | Adequate control group?                                                                       | Yes                      | Yes          | Yes          | Yes          | Yes          | Yes          | Yes          |
| 5  | Is there need to control extraneous variables? (Based on comparability of cases and controls) | Yes                      | No           | No           | No           | Yes          | No           | No           |
| 6  | Were extraneous variables controlled?                                                         | No                       | Yes          | No           | No           | No           | No           | No           |
| 7  | Is there social desirability bias?                                                            | Yes                      | No           | Yes          | No           | Yes          | Yes          | No           |
| 8  | Is exposure self-reported?                                                                    | Yes                      | No           | Yes          | No           | Yes          | Yes          | No           |
| 9  | Are outcomes self-reported?                                                                   | No                       | No           | No           | No           | No           | No           | No           |
| 10 | Is the conclusion definite?                                                                   | No                       | Yes          | Yes          | Yes          | No           | Yes          | Yes          |
|    | <b>Authors' judgement on risk of bias</b>                                                     | <b>II C</b>              | <b>III B</b> | <b>III B</b> | <b>III B</b> | <b>III C</b> | <b>III B</b> | <b>III B</b> |
