# Supplementary material
Source: HighWire-hosted journal article supplement (https://bmjopen.bmj.com/content/8/10/e022499)

## The use of herbal medicines for induction of labour and the incidence of haemorrhage (by type of treatment)

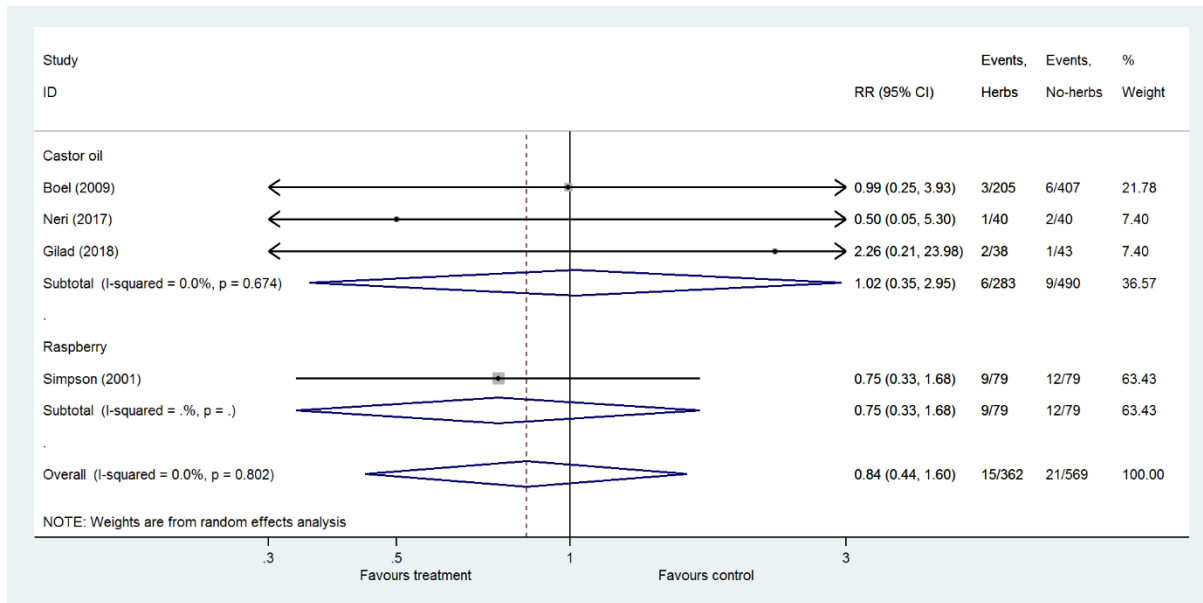

Supplement: inline-supplementary-material-13 [file inline-supplementary-material-13.pdf]
