# Supplementary material
Source: HighWire-hosted journal article supplement (https://bmjopen.bmj.com/content/8/10/e022499)

The use of herbal medicines for induction of labour and the incidence of meconium-stained liquor (by type of treatment)

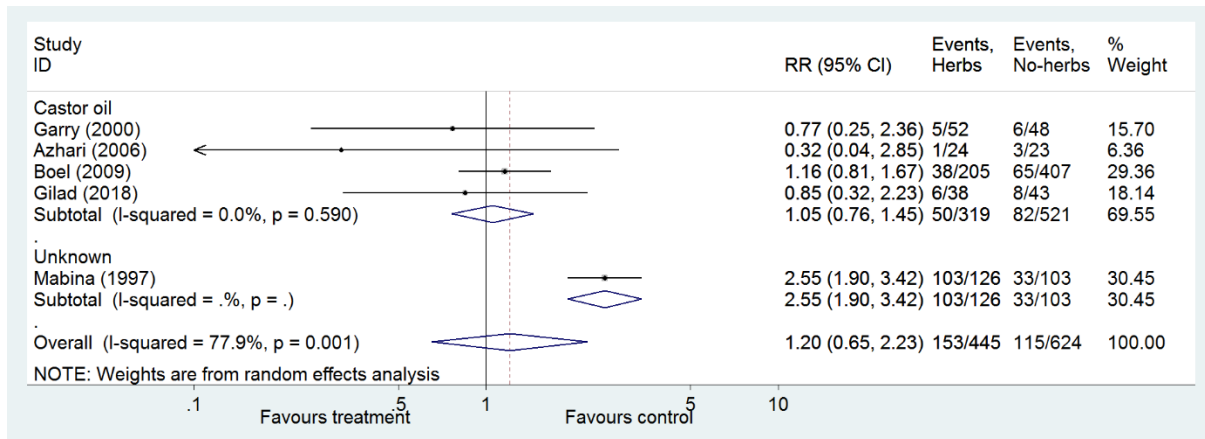

Supplement: inline-supplementary-material-15 [file inline-supplementary-material-15.pdf]
