# Supplementary material
Source: HighWire-hosted journal article supplement (https://bmjopen.bmj.com/content/8/10/e022499)

### The use of herbal medicines for induction of labour and onset of labour (by study design)

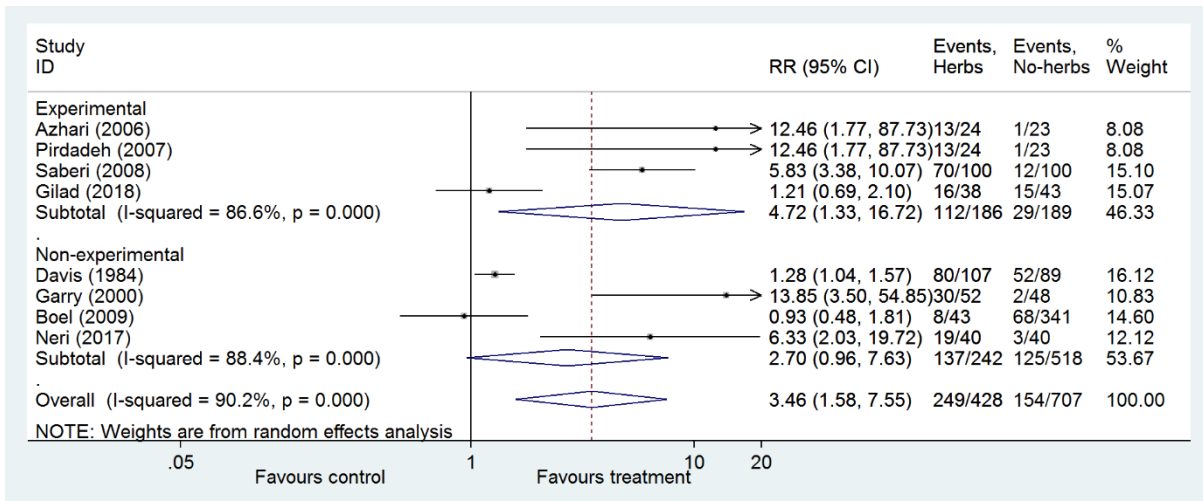

Supplement: inline-supplementary-material-8 [file inline-supplementary-material-8.pdf]
